# Supplementary material
Source: PubMed Central journal article supplement (PMC4157059)

Supplemental figure 1. Percentage of Thai and U.S. phages infecting a given strain

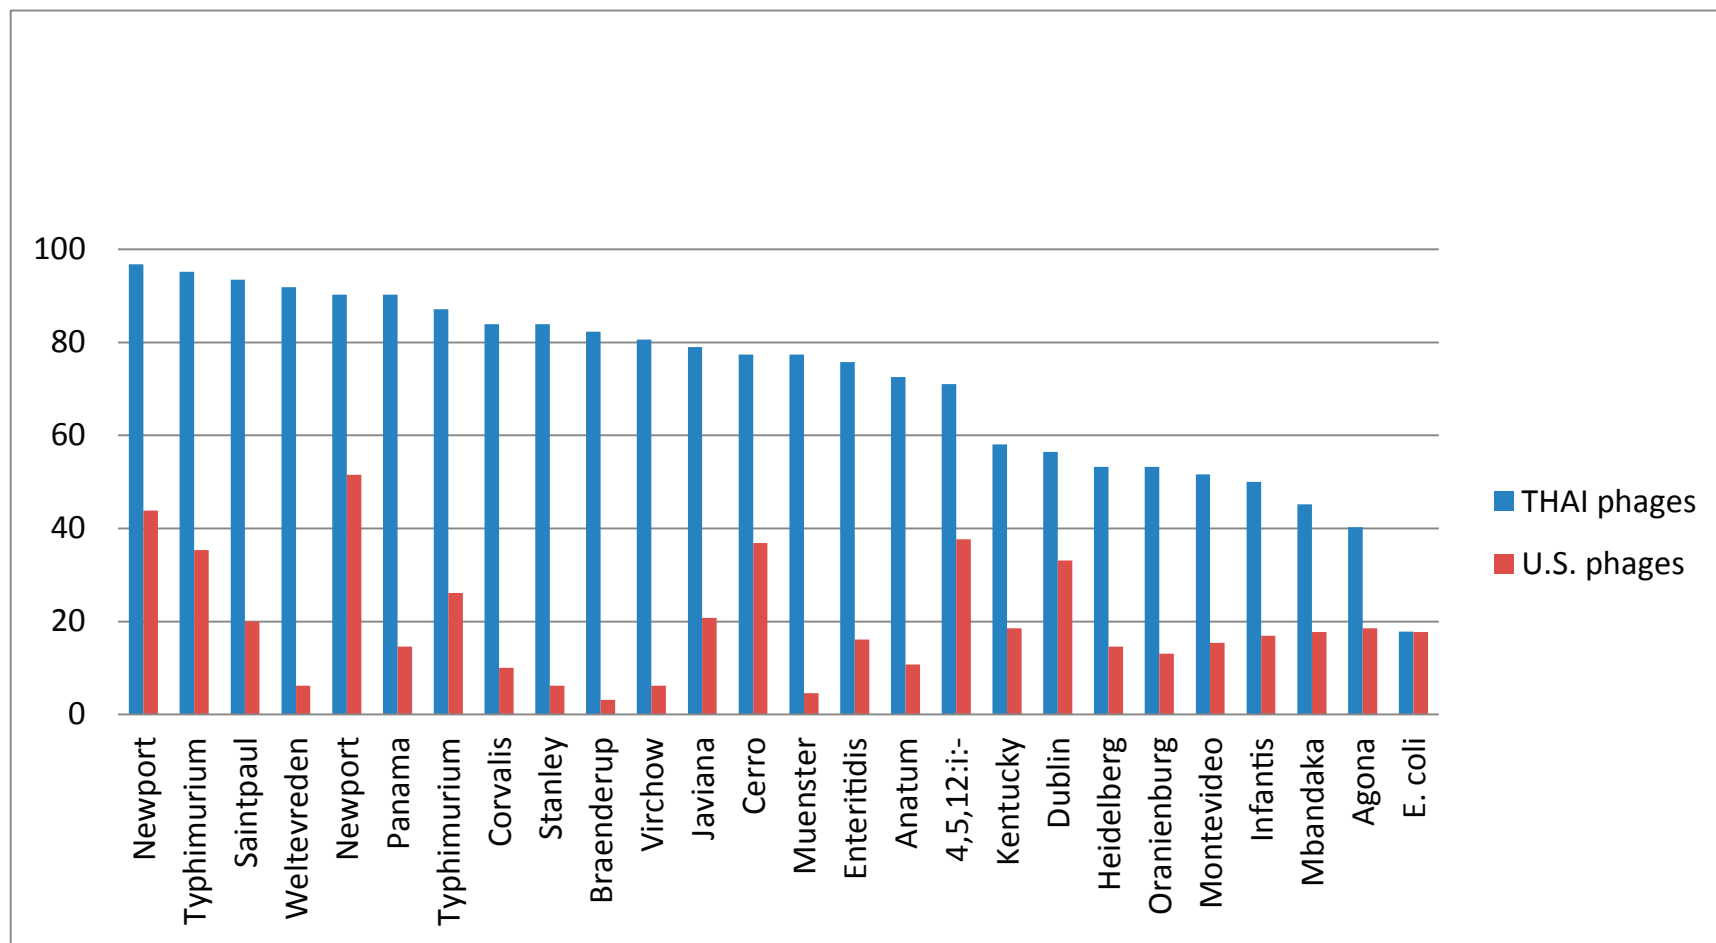

Supplement: NIHMS601957-supplement-03.pdf [file NIHMS601957-supplement-03.pdf]

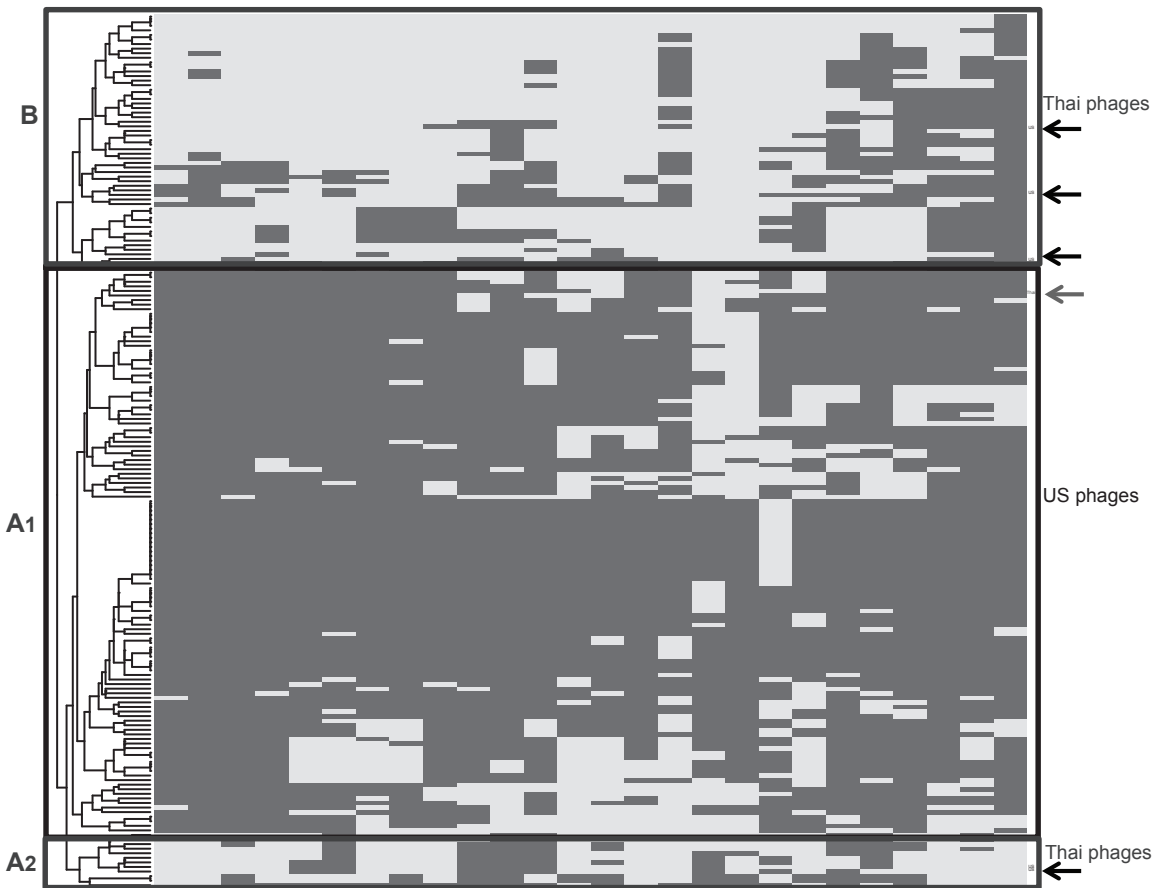

Supplement: NIHMS601957-supplement-04.pdf [file NIHMS601957-supplement-04.pdf]
